# Supplementary material for: Genetic analysis of photoperiod sensitivity associated with difference in ecotype in common buckwheat
Source: PubMed Central journal article supplement — Breed Sci. 2020 Feb 11;70(1):101–11. doi: 10.1270/jsbbs.19118 (PMC7180152; doi:10.1270/jsbbs.19118), 2020-02-11
Supplement: 70_101_s1.pdf [file 70_101_s1.pdf]

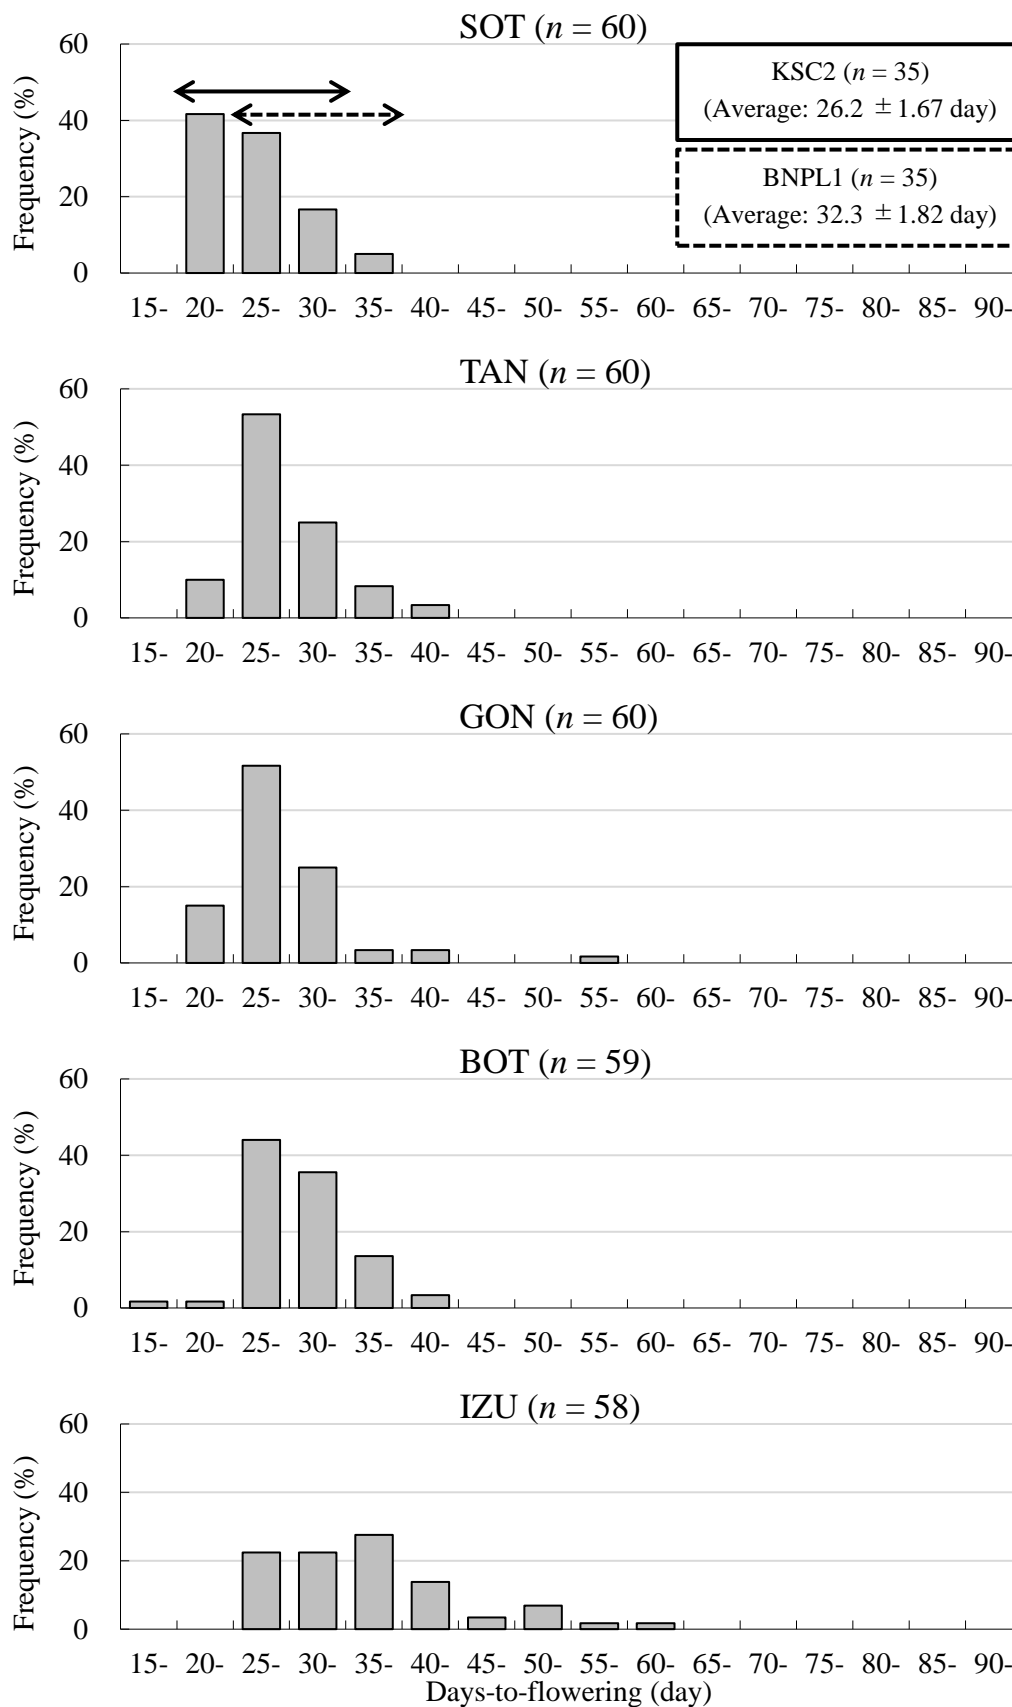

**Supplemental Fig. 1.** Distribution of days-to-flowering of each landrace under long-day (15 h) conditions. Solid arrows at SOT, KSC2; dashed arrows at SOT, BNPL1.

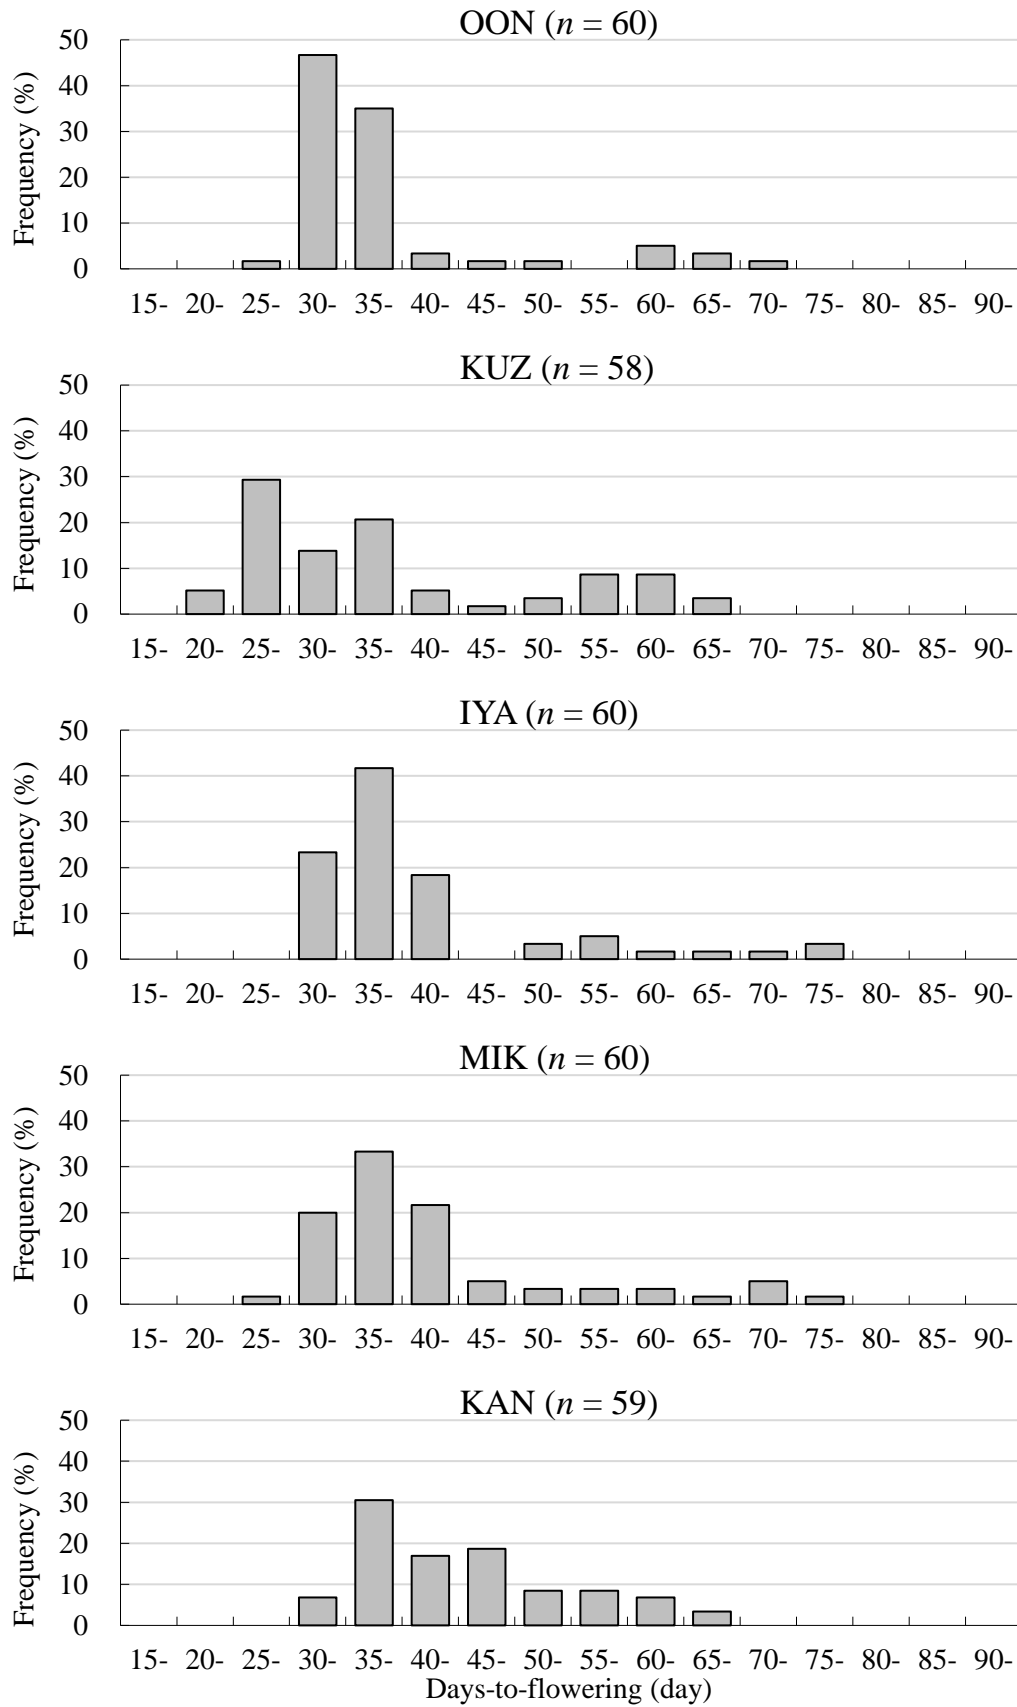

Supplemental Fig. 1. Continued

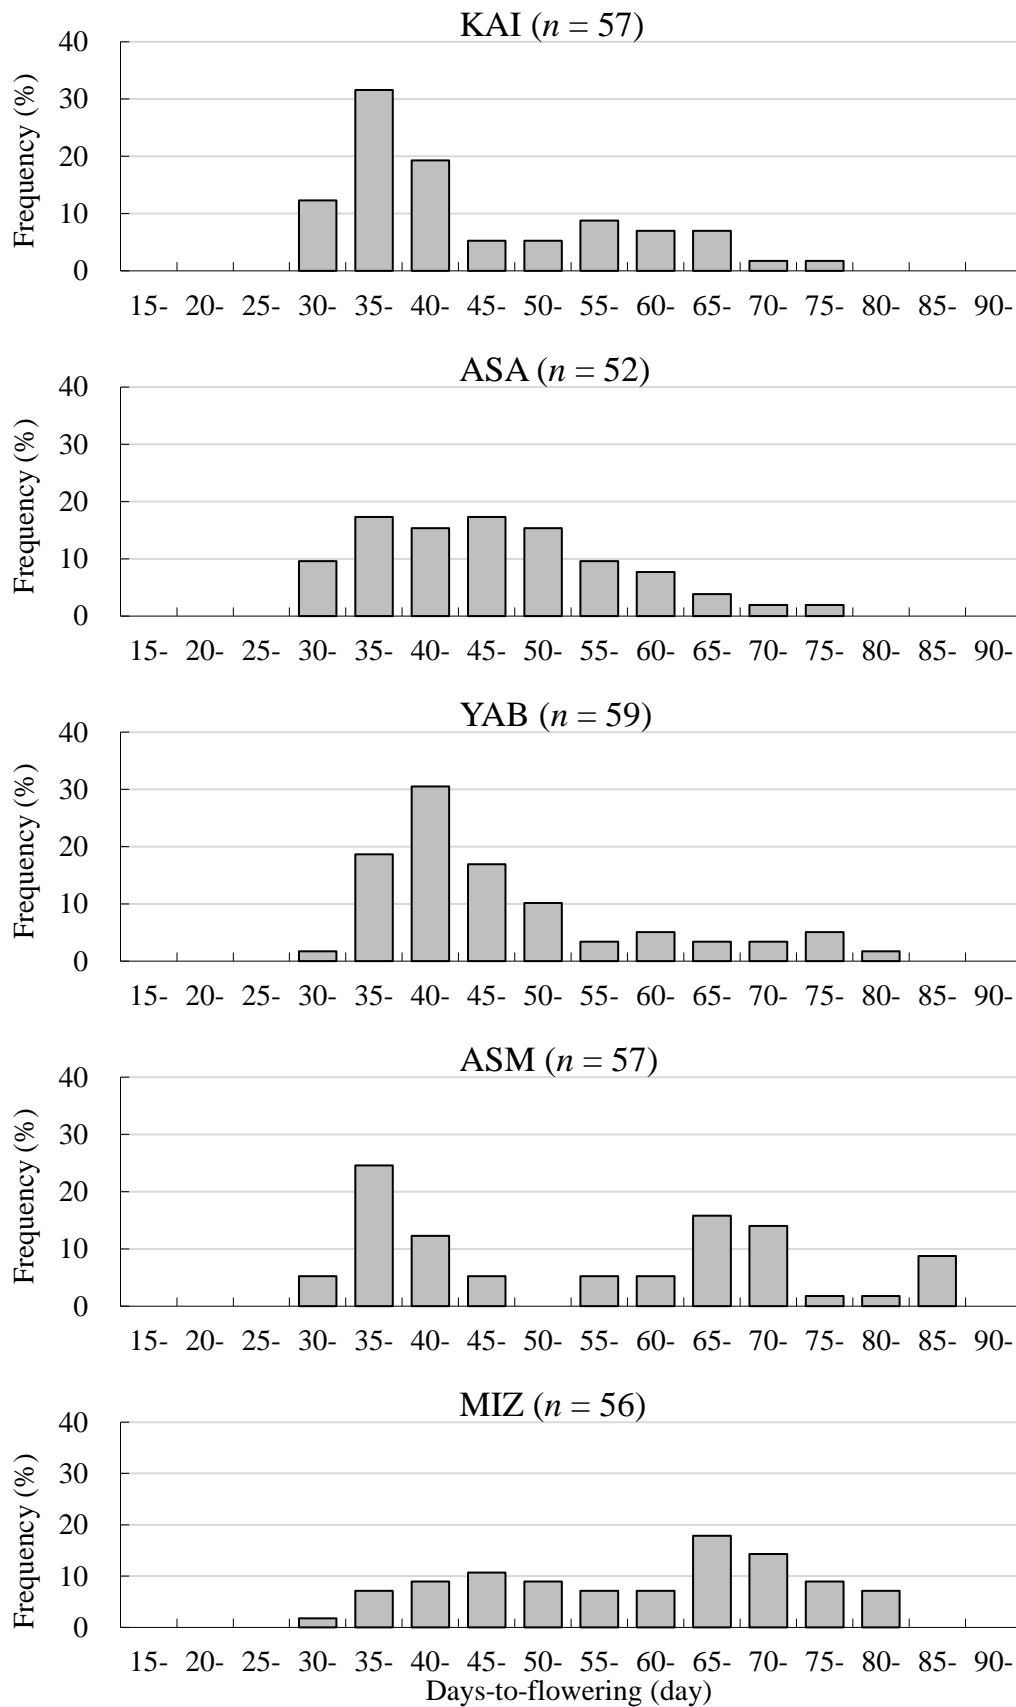

Supplemental Fig. 1. Continued
